# Supplementary material
Source: PubMed Central journal article supplement (PMC7833111)
Supplement: mmc1.pdf [file mmc1.pdf]

# THE LANCET Microbe

## Supplementary appendix

This appendix formed part of the original submission. We post it as supplied by the authors.

Supplement to: Gupta N, Rana S, Singh H. Innovative point-of-care molecular diagnostic test for COVID-19 in India. *Lancet Microbe* 2020; **1**: e277.

## APPENDIX

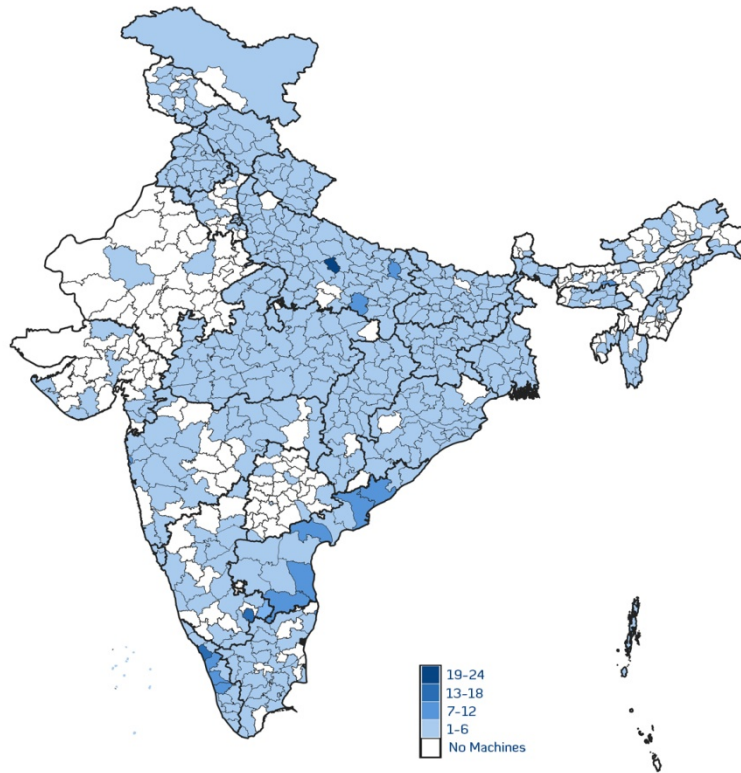

**Figure 1: Distribution of Truelab workstations across India**

Colours are based on the number of machines deployed in various districts.
